# Supplementary material
Source: HighWire-hosted journal article supplement (https://jeb.biologists.org/content/suppl/2014/12/11/217.24.4283)
Supplement: JEB109363.pdf [file JEB109363.pdf]

**Table S1. *Onuxodon fowleri*, morphometric data and rocker bone type**

|             | TL<br>(mm) | HL<br>(mm)  | RB type |
|-------------|------------|-------------|---------|
| Onuxo A     | 79         | 9.4         | 1       |
| Onuxo B     | 79         | 10.6        | 2       |
| Onuxo C     | 69         | 9.5         | 1       |
| Onuxo D     | 62         | 8.2         | 1       |
| Onuxo E     | 70         | 7           | 1       |
| Onuxo F     | 83         | 7.2         | 1       |
| Onuxo G     | 74         | ND          | 1       |
| Onuxo H     | 77         | 6.2         | 2       |
| Onuxo I     | 70         | ND          | 2       |
| Onuxo J     | 73.7       | 10.1        | 2       |
| Onuxo K     | 79         | 9.8         | 2       |
| Onuxo L     | 60         | 8.4         | 1       |
| Onuxo M     | 70.5       | 10.1        | 2       |
| Onuxo N     | 85         | 12.3        | 1       |
| Onuxo O     | 63         | 7.05        | 1/2*    |
| Onuxo P     | 78         | ND          | 2       |
| Onuxo Q     | 79         | ND          | ND      |
| Onuxo R     | 74         | ND          | 2       |
| Onuxo S     | 79         | ND          | ND      |
| Onuxo T     | 66         | 8.1         | 2       |
| Onuxo U     | 66         | 8.4         | 1       |
| Onuxo V     | 71         | 8.4         | 2       |
| Onuxo W     | 74         | 8.6         | 2       |
| Onuxo X     | 69         | 9.35        | 2       |
| Onuxo Y     | 69         | 8.6         | 2       |
| Onuxo Z     | 60         | 6.45        | 1/2*    |
| Onuxo AA    | 59.5       | ND          | ND      |
| Onuxo AB    | 72         | ND          | ND      |
| Onuxo AC    | 67.5       | 12          | 1       |
| Onuxo AD    | 73.5       | 11          | 2       |
| Onuxo AE    | 83         | 11          | 2       |
| Onuxo AF    | 76         | 10          | 2       |
| Onuxo AG    | 68         | 8.7         | 2       |
| Onuxo AH    | 69         | 8.9         | 1       |
| Onuxo AI    | 73         | ND          | 2       |
| <b>Mean</b> | <b>72</b>  | <b>9.05</b> |         |
| <b>Max.</b> | <b>85</b>  | <b>12.3</b> |         |
| <b>Min.</b> | <b>60</b>  | <b>6.2</b>  |         |

\*Rocker bone seemed immature and could not be categorized as Type 1 or 2. Type 1: female. Type 2: male. TL: total length. HL: head length. ND: no data because material was used and destroyed for other studies.
